# Supplementary material for: Glacial ring forms on Axel Heiberg Island, Nunavut, Canada
Source: Copernicus journal article supplement (doi:10.5194/tc-19-1695-2025), 2025-04-25
Supplement: Supplementary file 1 [file tc-19-1695-2025-supplement.pdf]

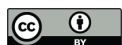

*Supplement of*

## **Glacial ring forms on Axel Heiberg Island, Nunavut, Canada**

**Shannon M. Hibbard et al.**

*Correspondence to:* Shannon M. Hibbard ([shannon.hibbard@dri.edu](mailto:shannon.hibbard@dri.edu))

The copyright of individual parts of the supplement might differ from the article licence.

# Supplementary files

Glacial Ring Forms on Axel Heiberg Island, Nunavut, Canada

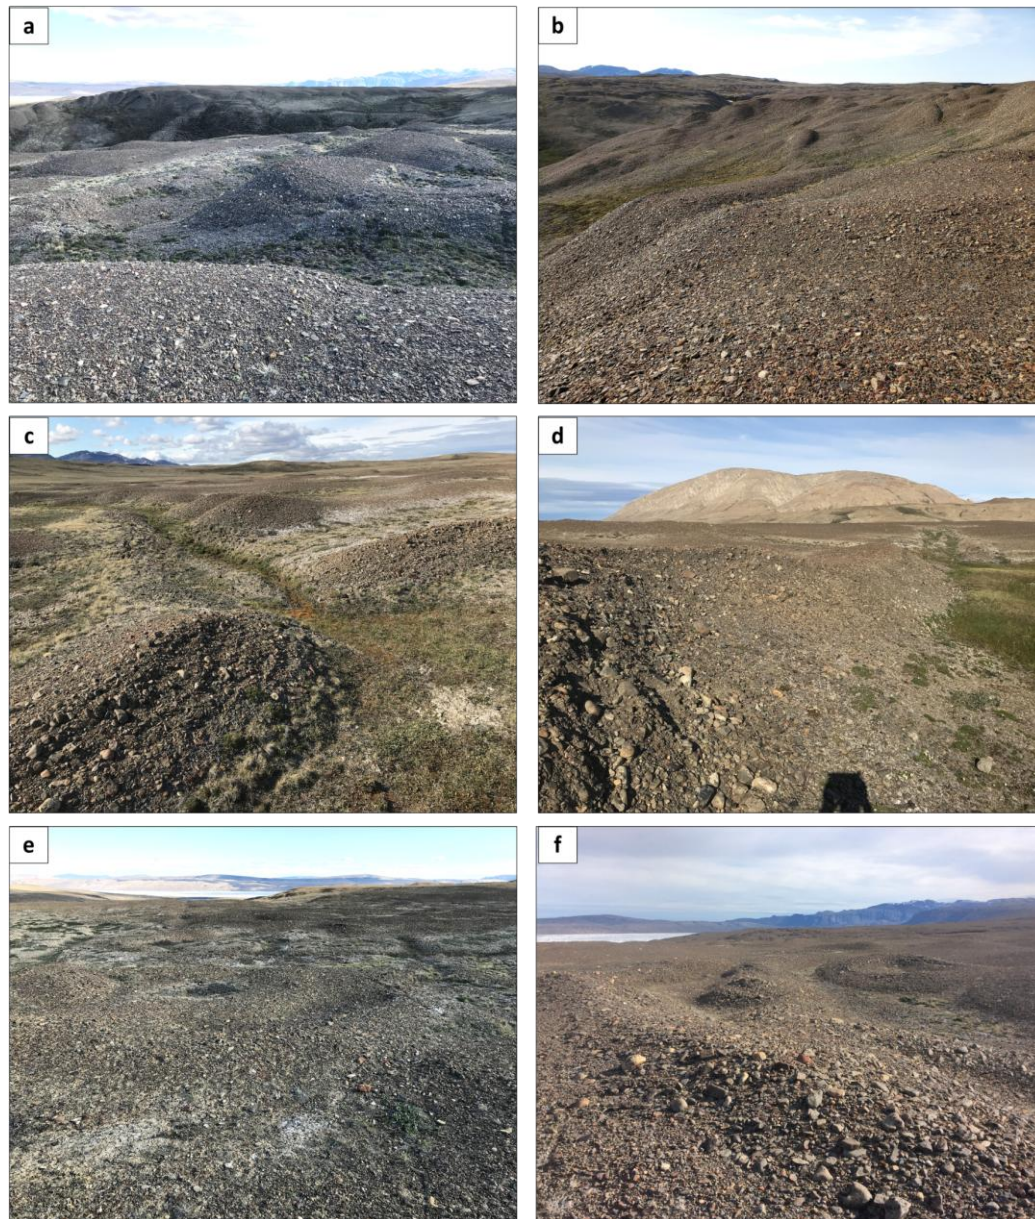

Figure S1: Field photos of terraces in the field region. (a) Rounded mounds at the downvalley part of the main field site looking at another terrace in the foreground. (b) Rounded mounds at terraces across the channel from the main field site. Edge of the ring form host deposit shows a thick deposit. (c) Vegetation (grasses and moss) at the main field site. (d) High center polygons in the ring form deposit at the main field site further upvalley where ring frms are less obvious. Weathered surface is darker than the underlying material. (e) Uppermost terrace composed of a thin and degraded ring form deposit. (f) Thick ring form deposit at the terraces across the channel from the main field site.



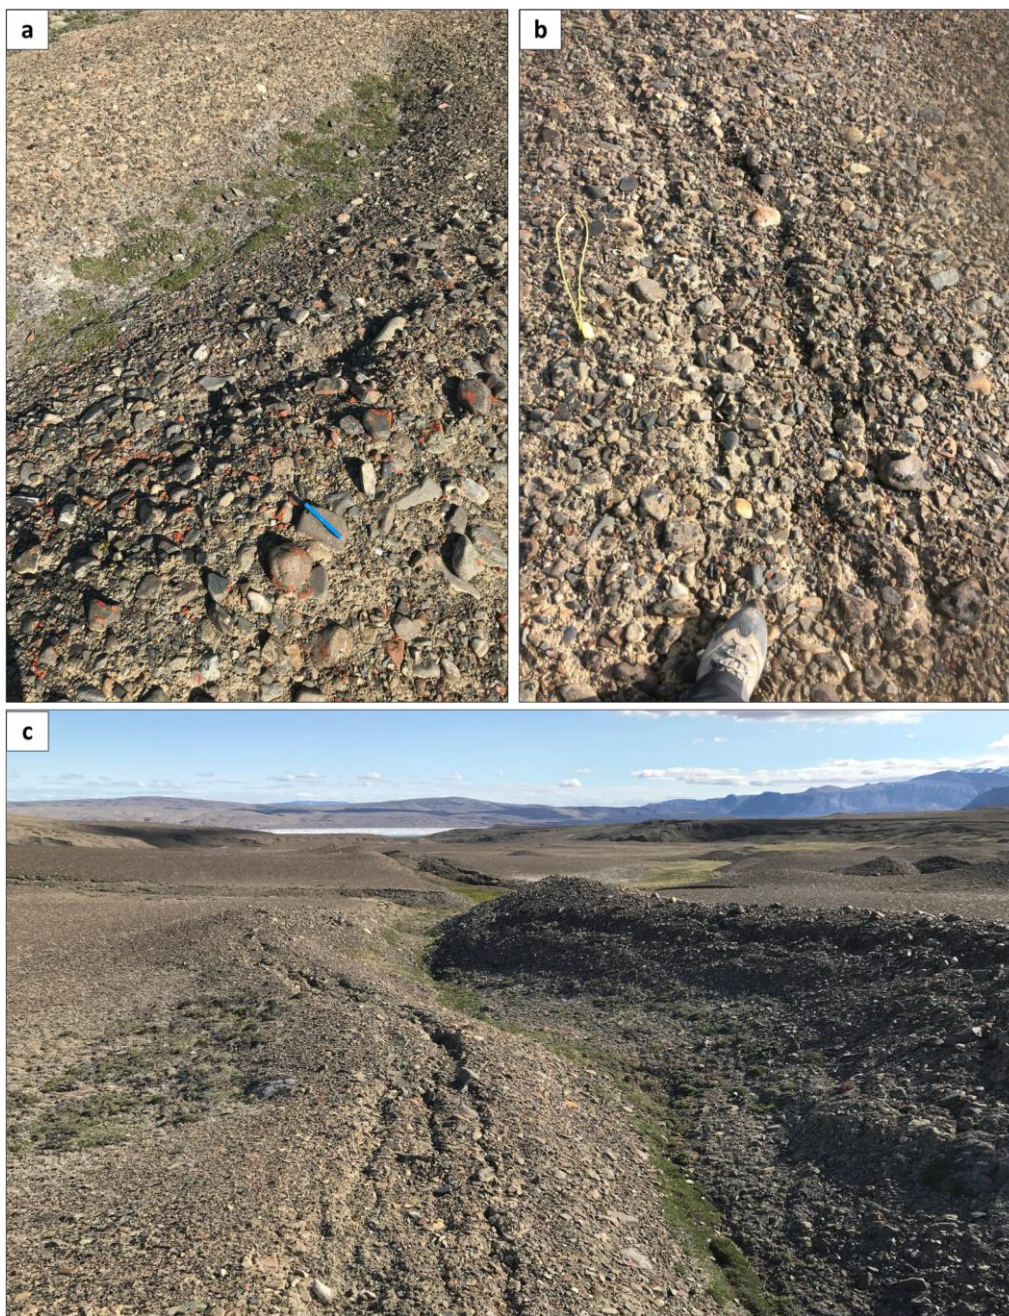

**Figure S2: Cracks in the main field site deposit. (a) Ring forms from Figure 6b shows a crack within the center of the trough and a crack near the axial trace of the ridge. Lichens dominate the ridges and grasses dominate the troughs. Blue pen for scale. (b) Cracks along the axial trace of a ring form ridge. Foot for scale. (c) Cracks along raised polygon shoulders in the deposit.**
